# Supplementary material
Source: Springer Nature journal article supplement (https://www.springermedizin.de/resource/supplementary/13256_2008_1003_MOESM1_ESM.pdf/9647594)

AP Erect

L

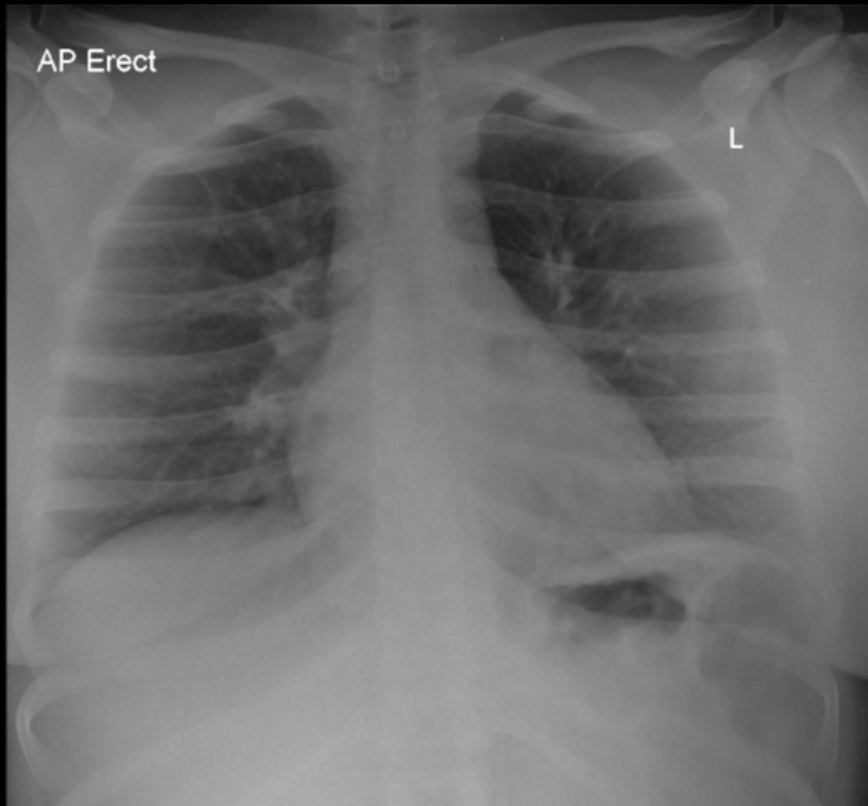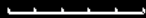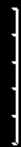

Supplement: MOESM1 [file 9647594]
